# Supplementary material for: A Hybrid MCDM Approach Based on Fuzzy MEREC-G and Fuzzy RATMI
Source: MDPI journal article supplement (doi:10.3390/math11173773), 2023-09-02
Supplement: s1 [file s1]

Table S2. Example 2

| Fuzzy MEREC-G                                                                                                                                                                                                                                                                                                                 |                   |        |        |                                       |        |        |                      |        |        |                                 |        |        |                          |        |        |  |  |
|-------------------------------------------------------------------------------------------------------------------------------------------------------------------------------------------------------------------------------------------------------------------------------------------------------------------------------|-------------------|--------|--------|---------------------------------------|--------|--------|----------------------|--------|--------|---------------------------------|--------|--------|--------------------------|--------|--------|--|--|
| Combined Fuzzy Decision Matrix*                                                                                                                                                                                                                                                                                               |                   |        |        |                                       |        |        |                      |        |        |                                 |        |        |                          |        |        |  |  |
| Alternatives                                                                                                                                                                                                                                                                                                                  | Distance (sq. ft) |        |        | West disposal site exposure to public |        |        | Availability on hand |        |        | Sensitivity towards environment |        |        | Area covered by PWD site |        |        |  |  |
|                                                                                                                                                                                                                                                                                                                               | Max               |        |        | Max                                   |        |        | Max                  |        |        | Max                             |        |        | Max                      |        |        |  |  |
|                                                                                                                                                                                                                                                                                                                               | Site 1            | Site 2 | Site 3 | Site 4                                | Site 5 | Site 1 | Site 2               | Site 3 | Site 4 | Site 5                          | Site 1 | Site 2 | Site 3                   | Site 4 | Site 5 |  |  |
| Site 1                                                                                                                                                                                                                                                                                                                        | 0.1500            | 0.3000 | 0.4500 | 0.1500                                | 0.3000 | 0.4500 | 0.1500               | 0.3000 | 0.4500 | 0.1500                          | 0.3000 | 0.4500 | 0.1500                   | 0.3000 | 0.4500 |  |  |
| Site 2                                                                                                                                                                                                                                                                                                                        | 0.0000            | 0.1000 | 0.2500 | 0.1500                                | 0.3000 | 0.4500 | 0.3500               | 0.5000 | 0.6500 | 0.3500                          | 0.5000 | 0.6500 | 0.3500                   | 0.5000 | 0.6500 |  |  |
| Site 3                                                                                                                                                                                                                                                                                                                        | 0.3500            | 0.5000 | 0.6500 | 0.3500                                | 0.5000 | 0.6500 | 0.3500               | 0.5000 | 0.6500 | 0.3500                          | 0.5000 | 0.6500 | 0.3500                   | 0.5000 | 0.6500 |  |  |
| Site 4                                                                                                                                                                                                                                                                                                                        | 0.3500            | 0.5000 | 0.6500 | 0.3500                                | 0.5000 | 0.6500 | 0.3500               | 0.5000 | 0.6500 | 0.3500                          | 0.5000 | 0.6500 | 0.3500                   | 0.5000 | 0.6500 |  |  |
| Site 5                                                                                                                                                                                                                                                                                                                        | 0.5500            | 0.7000 | 0.8500 | 0.3500                                | 0.5000 | 0.6500 | 0.3500               | 0.5000 | 0.6500 | 0.1500                          | 0.3000 | 0.4500 | 0.3500                   | 0.5000 | 0.6500 |  |  |
| * This table is adopted from (Vadivel, S. M., V. Sakthivel, L. Praveena, and V. Chandana. "Apartments Waste Disposal Location Evaluation Using TOPSIS and Fuzzy TOPSIS Methods." In International Conference on Innovations in Bio-Inspired Computing and Ap-plications, pp. 255-263. Cham: Springer Nature Switzerland,2022) |                   |        |        |                                       |        |        |                      |        |        |                                 |        |        |                          |        |        |  |  |
| Normalized Decision Matrix                                                                                                                                                                                                                                                                                                    |                   |        |        |                                       |        |        |                      |        |        |                                 |        |        |                          |        |        |  |  |
| Alternatives                                                                                                                                                                                                                                                                                                                  | Distance (sq. ft) |        |        | West disposal site exposure to public |        |        | Availability on hand |        |        | Sensitivity towards environment |        |        | Area covered by PWD site |        |        |  |  |
|                                                                                                                                                                                                                                                                                                                               | Max               |        |        | Max                                   |        |        | Max                  |        |        | Max                             |        |        | Max                      |        |        |  |  |
|                                                                                                                                                                                                                                                                                                                               | Site 1            | Site 2 | Site 3 | Site 4                                | Site 5 | Site 1 | Site 2               | Site 3 | Site 4 | Site 5                          | Site 1 | Site 2 | Site 3                   | Site 4 | Site 5 |  |  |
| Site 1                                                                                                                                                                                                                                                                                                                        | 0.1765            | 0.3529 | 0.5294 | 0.2308                                | 0.4615 | 0.6923 | 0.2308               | 0.4615 | 0.6923 | 0.6471                          | 0.8235 | 1.0000 | 0.2308                   | 0.4615 | 0.6923 |  |  |
| Site 2                                                                                                                                                                                                                                                                                                                        | 0.0000            | 0.1176 | 0.2941 | 0.2308                                | 0.4615 | 0.6923 | 0.5385               | 0.7692 | 1.0000 | 0.4118                          | 0.5882 | 0.7647 | 0.5385                   | 0.7692 | 1.0000 |  |  |
| Site 3                                                                                                                                                                                                                                                                                                                        | 0.4118            | 0.5882 | 0.7647 | 0.5385                                | 0.7692 | 1.0000 | 0.5385               | 0.7692 | 1.0000 | 0.4118                          | 0.5882 | 0.7647 | 0.5385                   | 0.7692 | 1.0000 |  |  |
| Site 4                                                                                                                                                                                                                                                                                                                        | 0.4118            | 0.5882 | 0.7647 | 0.5385                                | 0.7692 | 1.0000 | 0.5385               | 0.7692 | 1.0000 | 0.4118                          | 0.5882 | 0.7647 | 0.5385                   | 0.7692 | 1.0000 |  |  |
| Site 5                                                                                                                                                                                                                                                                                                                        | 0.6471            | 0.8235 | 1.0000 | 0.5385                                | 0.7692 | 1.0000 | 0.5385               | 0.7692 | 1.0000 | 0.1765                          | 0.3529 | 0.5294 | 0.5385                   | 0.7692 | 1.0000 |  |  |
| The changes in the overall performance of alternatives                                                                                                                                                                                                                                                                        |                   |        |        |                                       |        |        |                      |        |        |                                 |        |        |                          |        |        |  |  |
| Alternatives                                                                                                                                                                                                                                                                                                                  | Distance (sq. ft) |        |        | West disposal site exposure to public |        |        | Availability on hand |        |        | Sensitivity towards environment |        |        | Area covered by PWD site |        |        |  |  |
|                                                                                                                                                                                                                                                                                                                               | Max               |        |        | Max                                   |        |        | Max                  |        |        | Max                             |        |        | Max                      |        |        |  |  |
|                                                                                                                                                                                                                                                                                                                               | Site 1            | Site 2 | Site 3 | Site 4                                | Site 5 | Site 1 | Site 2               | Site 3 | Site 4 | Site 5                          | Site 1 | Site 2 | Site 3                   | Site 4 | Site 5 |  |  |
| Site 1                                                                                                                                                                                                                                                                                                                        | 0.3803            | 0.6049 | 0.8020 | 0.3604                                | 0.5733 | 0.7601 | 0.3604               | 0.5733 | 0.7601 | 0.2933                          | 0.5106 | 0.7062 | 0.2792                   | 0.4988 | 0.7097 |  |  |
| Site 2                                                                                                                                                                                                                                                                                                                        | 0.4876            | 0.6937 | 0.8806 | 0.0269                                | 0.5278 | 0.7420 | 0.0227               | 0.4765 | 0.6894 | 0.0239                          | 0.5028 | 0.7274 | 0.0088                   | 0.3959 | 0.6282 |  |  |
| Site 3                                                                                                                                                                                                                                                                                                                        | 0.5776            | 0.7683 | 0.9478 | 0.5474                                | 0.7282 | 0.8983 | 0.5474               | 0.7282 | 0.8983 | 0.5776                          | 0.7683 | 0.9478 | 0.4709                   | 0.6727 | 0.8745 |  |  |
| Site 4                                                                                                                                                                                                                                                                                                                        | 0.5776            | 0.7683 | 0.9478 | 0.5474                                | 0.7282 | 0.8983 | 0.5474               | 0.7282 | 0.8983 | 0.5776                          | 0.7683 | 0.9478 | 0.4709                   | 0.6727 | 0.8745 |  |  |
| Site 5                                                                                                                                                                                                                                                                                                                        | 0.4876            | 0.6937 | 0.8806 | 0.5058                                | 0.7032 | 0.8806 | 0.5058               | 0.7032 | 0.8806 | 0.6322                          | 0.8218 | 1.0000 | 0.4266                   | 0.6440 | 0.8530 |  |  |
| Resulting effect and weights of the Fuzzy MEREC-G                                                                                                                                                                                                                                                                             |                   |        |        |                                       |        |        |                      |        |        |                                 |        |        |                          |        |        |  |  |
| Removal Effect                                                                                                                                                                                                                                                                                                                |                   |        |        |                                       |        |        |                      |        |        |                                 |        |        |                          |        |        |  |  |
| E1                                                                                                                                                                                                                                                                                                                            |                   |        | E2     |                                       |        | E3     |                      |        | E4     |                                 |        | E5     |                          |        |        |  |  |
| Max                                                                                                                                                                                                                                                                                                                           |                   |        | Max    |                                       |        | Max    |                      |        | Max    |                                 |        | Max    |                          |        |        |  |  |
| 2.5106                                                                                                                                                                                                                                                                                                                        |                   |        | 3.5289 |                                       |        | 4.4587 |                      |        | 1.9879 |                                 |        | 3.2607 |                          |        | 4.1792 |  |  |
| 1.9838                                                                                                                                                                                                                                                                                                                        |                   |        | 3.2094 |                                       |        | 4.1266 |                      |        | 2.1046 |                                 |        | 3.3718 |                          |        | 4.3291 |  |  |
| 1.6564                                                                                                                                                                                                                                                                                                                        |                   |        | 2.8841 |                                       |        | 3.9399 |                      |        |        |                                 |        |        |                          |        |        |  |  |
| Fuzzy Weights                                                                                                                                                                                                                                                                                                                 |                   |        |        |                                       |        |        |                      |        |        |                                 |        |        |                          |        |        |  |  |
| W1                                                                                                                                                                                                                                                                                                                            |                   |        | W2     |                                       |        | W3     |                      |        | W4     |                                 |        | W5     |                          |        |        |  |  |
| Max                                                                                                                                                                                                                                                                                                                           |                   |        | Max    |                                       |        | Max    |                      |        | Max    |                                 |        | Max    |                          |        |        |  |  |
| 0.1194                                                                                                                                                                                                                                                                                                                        |                   |        | 0.2171 |                                       |        | 0.4353 |                      |        | 0.0945 |                                 |        | 0.2006 |                          |        | 0.4080 |  |  |
| 0.0943                                                                                                                                                                                                                                                                                                                        |                   |        | 0.1974 |                                       |        | 0.4029 |                      |        | 0.1001 |                                 |        | 0.2074 |                          |        | 0.4226 |  |  |
| 0.0787                                                                                                                                                                                                                                                                                                                        |                   |        | 0.1774 |                                       |        | 0.3846 |                      |        |        |                                 |        |        |                          |        |        |  |  |
| Crisp Weights                                                                                                                                                                                                                                                                                                                 |                   |        |        |                                       |        |        |                      |        |        |                                 |        |        |                          |        |        |  |  |
| W1*                                                                                                                                                                                                                                                                                                                           |                   |        | W2*    |                                       |        | W3*    |                      |        | W4*    |                                 |        | W5*    |                          |        |        |  |  |
| Max                                                                                                                                                                                                                                                                                                                           |                   |        | Max    |                                       |        | Max    |                      |        | Max    |                                 |        | Max    |                          |        |        |  |  |
| 0.2372                                                                                                                                                                                                                                                                                                                        |                   |        | 0.2175 |                                       |        | 0.2145 |                      |        | 0.2254 |                                 |        | 0.1955 |                          |        |        |  |  |

## Fuzzy RATMI

### The fuzzy weighted decision-making matrix

| Alternatives | Distance (sq. ft) |        |        | West disposal site exposure to public |        |        | Availability on hand |        |        | Sensitivity towards environment |        |        | Area covered by PWD site |        |        |
|--------------|-------------------|--------|--------|---------------------------------------|--------|--------|----------------------|--------|--------|---------------------------------|--------|--------|--------------------------|--------|--------|
|              | Max               |        |        | Max                                   |        |        | Max                  |        |        | Max                             |        |        | Max                      |        |        |
| Site 1       | 0.0211            | 0.0766 | 0.2304 | 0.0218                                | 0.0926 | 0.2825 | 0.0218               | 0.0911 | 0.2789 | 0.0647                          | 0.1708 | 0.4226 | 0.0182                   | 0.0819 | 0.2663 |
| Site 2       | 0.0000            | 0.0255 | 0.1280 | 0.0218                                | 0.0926 | 0.2825 | 0.0508               | 0.1519 | 0.4029 | 0.0412                          | 0.1220 | 0.3232 | 0.0424                   | 0.1365 | 0.3846 |
| Site 3       | 0.0491            | 0.1277 | 0.3329 | 0.0509                                | 0.1543 | 0.4080 | 0.0508               | 0.1519 | 0.4029 | 0.0412                          | 0.1220 | 0.3232 | 0.0424                   | 0.1365 | 0.3846 |
| Site 4       | 0.0491            | 0.1277 | 0.3329 | 0.0509                                | 0.1543 | 0.4080 | 0.0508               | 0.1519 | 0.4029 | 0.0412                          | 0.1220 | 0.3232 | 0.0424                   | 0.1365 | 0.3846 |
| Site 5       | 0.0772            | 0.1788 | 0.4353 | 0.0509                                | 0.1543 | 0.4080 | 0.0508               | 0.1519 | 0.4029 | 0.0177                          | 0.0732 | 0.2237 | 0.0424                   | 0.1365 | 0.3846 |

### The fuzzy magnitude of components' values

| Qk     |        |        | Qh     |        |        |
|--------|--------|--------|--------|--------|--------|
| 0.1309 | 0.3559 | 0.9191 | 0.0000 | 0.0000 | 0.0000 |

### Results of the Fuzzy MCRAT method

| Alternatives | Vik    |        |        | Vih    |        |        | Z11,j  |        |        | Z22,j  |        |        | tr(Zi)~ |        |        | tr(Zi) | Rank |
|--------------|--------|--------|--------|--------|--------|--------|--------|--------|--------|--------|--------|--------|---------|--------|--------|--------|------|
| Site 1       | 0.0769 | 0.2421 | 0.6784 | 0.0000 | 0.0000 | 0.0000 | 0.0101 | 0.0862 | 0.6235 | 0.0000 | 0.0000 | 0.0000 | 0.0101  | 0.0862 | 0.6235 | 0.1630 | 5    |
| Site 2       | 0.0809 | 0.2565 | 0.7147 | 0.0000 | 0.0000 | 0.0000 | 0.0106 | 0.0913 | 0.6569 | 0.0000 | 0.0000 | 0.0000 | 0.0106  | 0.0913 | 0.6569 | 0.1721 | 4    |
| Site 3       | 0.1053 | 0.3110 | 0.8318 | 0.0000 | 0.0000 | 0.0000 | 0.0138 | 0.1107 | 0.7645 | 0.0000 | 0.0000 | 0.0000 | 0.0138  | 0.1107 | 0.7645 | 0.2035 | 2    |
| Site 4       | 0.1053 | 0.3110 | 0.8318 | 0.0000 | 0.0000 | 0.0000 | 0.0138 | 0.1107 | 0.7645 | 0.0000 | 0.0000 | 0.0000 | 0.0138  | 0.1107 | 0.7645 | 0.2035 | 2    |
| Site 5       | 0.1151 | 0.3207 | 0.8463 | 0.0000 | 0.0000 | 0.0000 | 0.0151 | 0.1141 | 0.7778 | 0.0000 | 0.0000 | 0.0000 | 0.0151  | 0.1141 | 0.7778 | 0.2082 | 1    |

### Results of the Fuzzy RAMS technique

| Alternatives | Max    |        |        | Min    |        |        | Median |        |        | Median Similarity |        |        | ms(Mi) | Rank |
|--------------|--------|--------|--------|--------|--------|--------|--------|--------|--------|-------------------|--------|--------|--------|------|
|              | Qk~    |        |        | Qh~    |        |        | D~     |        |        | ms(Mi~)           |        |        |        |      |
|              | 0.1309 | 0.3559 | 0.9191 | 0.0000 | 0.0000 | 0.0000 | 0.0654 | 0.1779 | 0.4596 |                   |        |        |        |      |
|              | Vik~   |        |        | Vih~   |        |        | Di~    |        |        |                   |        |        |        |      |
|              | Site 1 | 0.0769 | 0.2421 | 0.6784 | 0.0000 | 0.0000 | 0.0000 | 0.0385 | 0.1211 | 0.3392            | 0.0837 | 0.6804 |        |      |
| Site 2       | 0.0809 | 0.2565 | 0.7147 | 0.0000 | 0.0000 | 0.0000 | 0.0405 | 0.1283 | 0.3574 | 0.0881            | 0.7208 | 5.4619 | 1.4055 | 4    |
| Site 3       | 0.1053 | 0.3110 | 0.8318 | 0.0000 | 0.0000 | 0.0000 | 0.0526 | 0.1555 | 0.4159 | 0.1145            | 0.8738 | 6.3566 | 1.6611 | 2    |
| Site 4       | 0.1053 | 0.3110 | 0.8318 | 0.0000 | 0.0000 | 0.0000 | 0.0526 | 0.1555 | 0.4159 | 0.1145            | 0.8738 | 6.3566 | 1.6611 | 2    |
| Site 5       | 0.1151 | 0.3207 | 0.8463 | 0.0000 | 0.0000 | 0.0000 | 0.0575 | 0.1603 | 0.4231 | 0.1252            | 0.9011 | 6.4672 | 1.6994 | 1    |

### Alternatives rankings according to the Fuzzy RATMI method

| Alternatives | Fuzzy MCRAT |        | Fuzzy RAMS |        | Majority Index |   | Rank |
|--------------|-------------|--------|------------|--------|----------------|---|------|
|              | tr*         | 0.1630 | ms*        | 1.3316 | Ei             |   |      |
|              | tr-         | 0.2082 | ms-        | 1.6994 |                |   |      |
|              | tr(Zi)      |        | ms(Mi)     |        |                |   |      |
|              |             |        |            |        |                |   |      |
| Site 1       | 0.1630      |        | 1.3316     |        | 0.0000         | 5 |      |
| Site 2       | 0.1721      |        | 1.4055     |        | 0.2009         | 4 |      |
| Site 3       | 0.2035      |        | 1.6611     |        | 0.8955         | 2 |      |
| Site 4       | 0.2035      |        | 1.6611     |        | 0.8955         | 2 |      |
| Site 5       | 0.2082      |        | 1.6994     |        | 1.0000         | 1 |      |
