# Supplementary material for: A Hybrid MCDM Approach Based on Fuzzy MEREC-G and Fuzzy RATMI
Source: MDPI journal article supplement (doi:10.3390/math11173773), 2023-09-02
Supplement: s1 [file s1]

Table S1. Example 1

## Fuzzy MEREC-G

## Combined Fuzzy Decision Matrix\*

| Alternatives | Criteria |        |        |          |        |        |          |        |        |        |        |        |             |        |        |               |        |        |             |        |        |
|--------------|----------|--------|--------|----------|--------|--------|----------|--------|--------|--------|--------|--------|-------------|--------|--------|---------------|--------|--------|-------------|--------|--------|
|              | Quality  |        |        | Expenses |        |        | Delivery |        |        | Source |        |        | Flexibility |        |        | Communication |        |        | Reliability |        |        |
|              | Min      |        |        | Max      |        |        | Min      |        |        | Max    |        |        | Max         |        |        | Max           |        |        | Max         |        |        |
|              |          |        |        |          |        |        |          |        |        |        |        |        |             |        |        |               |        |        |             |        |        |
| Russia       | 0.2500   | 0.3600 | 0.4800 | 0.2300   | 0.3600 | 0.4900 | 0.2500   | 0.3800 | 0.5000 | 0.2700 | 0.3800 | 0.4800 | 0.2700      | 0.3900 | 0.5100 | 0.2500        | 0.3800 | 0.5000 | 0.2200      | 0.3400 | 0.4600 |
| Romania      | 0.3300   | 0.4400 | 0.5400 | 0.3800   | 0.5000 | 0.6200 | 0.3100   | 0.4300 | 0.5400 | 0.2500 | 0.3800 | 0.5000 | 0.4100      | 0.5300 | 0.6400 | 0.3600        | 0.4800 | 0.5900 | 0.3000      | 0.4100 | 0.5300 |
| Ukraine      | 0.2600   | 0.3900 | 0.5200 | 0.2700   | 0.3800 | 0.4800 | 0.4200   | 0.5400 | 0.6600 | 0.4500 | 0.5600 | 0.6800 | 0.2700      | 0.3800 | 0.4800 | 0.3100        | 0.4300 | 0.5400 | 0.3800      | 0.5000 | 0.6300 |
| Australia    | 0.3800   | 0.5000 | 0.6300 | 0.3800   | 0.5000 | 0.6200 | 0.2900   | 0.4100 | 0.5300 | 0.2200 | 0.3400 | 0.4600 | 0.3500      | 0.4800 | 0.6000 | 0.4600        | 0.5800 | 0.6900 | 0.4200      | 0.5400 | 0.6600 |
| Syria        | 0.2800   | 0.4000 | 0.5300 | 0.3400   | 0.4600 | 0.5800 | 0.3300   | 0.4400 | 0.5500 | 0.3500 | 0.4800 | 0.6000 | 0.2900      | 0.4100 | 0.5300 | 0.3000        | 0.4100 | 0.5300 | 0.2300      | 0.3500 | 0.4700 |

\* This table is adopted from (Magabieh, G.M. Evaluating Wheat Suppliers Using Fuzzy MCDM Technique. *Sustainability* **2023**, *15*, 10519. <https://doi.org/10.3390/su151310519>)

## Normalized Decision Matrix

| Alternatives | Quality |        |        | Expenses |        |        | Delivery |        |        | Source |        |        | Flexibility |        |        | Communication |        |        | Reliability |        |        |
|--------------|---------|--------|--------|----------|--------|--------|----------|--------|--------|--------|--------|--------|-------------|--------|--------|---------------|--------|--------|-------------|--------|--------|
|              | Min     |        |        | Max      |        |        | Min      |        |        | Max    |        |        | Max         |        |        | Max           |        |        | Max         |        |        |
|              |         |        |        |          |        |        |          |        |        |        |        |        |             |        |        |               |        |        |             |        |        |
| Russia       | 0.5208  | 0.6944 | 1.0000 | 0.3710   | 0.5806 | 0.7903 | 0.5000   | 0.6579 | 1.0000 | 0.3971 | 0.5588 | 0.7059 | 0.4219      | 0.6094 | 0.7969 | 0.3623        | 0.5507 | 0.7246 | 0.3333      | 0.5152 | 0.6970 |
| Romania      | 0.4630  | 0.5682 | 0.7576 | 0.6129   | 0.8065 | 1.0000 | 0.4630   | 0.5814 | 0.8065 | 0.3676 | 0.5588 | 0.7353 | 0.6406      | 0.8281 | 1.0000 | 0.5217        | 0.6957 | 0.8551 | 0.4545      | 0.6212 | 0.8030 |
| Ukraine      | 0.4808  | 0.6410 | 0.9615 | 0.4355   | 0.6129 | 0.7742 | 0.3788   | 0.4630 | 0.5952 | 0.6618 | 0.8235 | 1.0000 | 0.4219      | 0.5938 | 0.7500 | 0.4493        | 0.6232 | 0.7826 | 0.5758      | 0.7576 | 0.9545 |
| Australia    | 0.3968  | 0.5000 | 0.6579 | 0.6129   | 0.8065 | 1.0000 | 0.4717   | 0.6098 | 0.8621 | 0.3235 | 0.5000 | 0.6765 | 0.5469      | 0.7500 | 0.9375 | 0.6667        | 0.8406 | 1.0000 | 0.6364      | 0.8182 | 1.0000 |
| Syria        | 0.4717  | 0.6250 | 0.8929 | 0.5484   | 0.7419 | 0.9355 | 0.4545   | 0.5682 | 0.7576 | 0.5147 | 0.7059 | 0.8824 | 0.4531      | 0.6406 | 0.8281 | 0.4348        | 0.5942 | 0.7681 | 0.3485      | 0.5303 | 0.7121 |

## The changes in the overall performance of alternatives

| Alternatives | Quality |        |        | Expenses |        |        | Delivery |        |        | Source |        |        | Flexibility |        |        | Communication |        |        | Reliability |        |        |
|--------------|---------|--------|--------|----------|--------|--------|----------|--------|--------|--------|--------|--------|-------------|--------|--------|---------------|--------|--------|-------------|--------|--------|
|              | Min     |        |        | Max      |        |        | Min      |        |        | Max    |        |        | Max         |        |        | Max           |        |        | Max         |        |        |
|              |         |        |        |          |        |        |          |        |        |        |        |        |             |        |        |               |        |        |             |        |        |
| Russia       | 0.4503  | 0.6242 | 0.8078 | 0.4726   | 0.6403 | 0.8355 | 0.4529   | 0.6290 | 0.8078 | 0.4681 | 0.6438 | 0.8490 | 0.4083      | 0.5897 | 0.8097 | 0.4188        | 0.5997 | 0.8226 | 0.4246      | 0.6065 | 0.8280 |
| Romania      | 0.5532  | 0.7131 | 0.8795 | 0.5314   | 0.6783 | 0.8453 | 0.5532   | 0.7108 | 0.8717 | 0.5717 | 0.7148 | 0.8833 | 0.4748      | 0.6330 | 0.8220 | 0.4913        | 0.6517 | 0.8437 | 0.5027      | 0.6641 | 0.8526 |
| Ukraine      | 0.5311  | 0.6775 | 0.8241 | 0.5386   | 0.6818 | 0.8500 | 0.5495   | 0.7097 | 0.8826 | 0.5074 | 0.6537 | 0.8195 | 0.4884      | 0.6431 | 0.8317 | 0.4833        | 0.6379 | 0.8258 | 0.4638      | 0.6175 | 0.7989 |
| Australia    | 0.5786  | 0.7445 | 0.9174 | 0.5437   | 0.6954 | 0.8641 | 0.5645   | 0.7237 | 0.8826 | 0.5957 | 0.7445 | 0.9137 | 0.5006      | 0.6625 | 0.8524 | 0.4844        | 0.6500 | 0.8433 | 0.4882      | 0.6530 | 0.8433 |
| Syria        | 0.5086  | 0.6691 | 0.8351 | 0.4978   | 0.6530 | 0.8296 | 0.5113   | 0.6783 | 0.8549 | 0.5023 | 0.6576 | 0.8365 | 0.4575      | 0.6232 | 0.8206 | 0.4607        | 0.6311 | 0.8310 | 0.4780      | 0.6432 | 0.8415 |

## Resulting effect and weights of the Fuzzy MEREC-G

## Removal Effect

| E1     |        |        | E2     |        |        | E3     |        |        | E4     |        |        | E5     |        |        | E6     |        |        | E7     |        |        |
|--------|--------|--------|--------|--------|--------|--------|--------|--------|--------|--------|--------|--------|--------|--------|--------|--------|--------|--------|--------|--------|
| Min    |        |        | Max    |        |        | Min    |        |        | Max    |        |        | Max    |        |        | Max    |        |        | Max    |        |        |
| 2.6217 | 3.4284 | 4.2640 | 2.5842 | 3.3488 | 4.2245 | 2.6313 | 3.4515 | 4.2997 | 2.6452 | 3.4144 | 4.3021 | 2.3296 | 3.1515 | 4.1364 | 2.3385 | 3.1704 | 4.1664 | 2.3572 | 3.1841 | 4.1643 |

## Fuzzy Weights

| W1     |        |        | W2     |        |        | W3     |        |        | W4     |        |        | W5     |        |        | W6     |        |        | W7     |        |        |
|--------|--------|--------|--------|--------|--------|--------|--------|--------|--------|--------|--------|--------|--------|--------|--------|--------|--------|--------|--------|--------|
| Min    |        |        | Max    |        |        | Min    |        |        | Max    |        |        | Max    |        |        | Max    |        |        | Max    |        |        |
| 0.0887 | 0.1481 | 0.2435 | 0.0874 | 0.1447 | 0.2413 | 0.0890 | 0.1491 | 0.2456 | 0.0895 | 0.1475 | 0.2457 | 0.0788 | 0.1361 | 0.2363 | 0.0791 | 0.1370 | 0.2380 | 0.0798 | 0.1375 | 0.2379 |

## Crisp Weights

| W1*    |  |  | W2*    |  |  | W3*    |  |  | W4*    |  |  | W5*    |  |  | W6*    |  |  | W7*    |  |  |
|--------|--|--|--------|--|--|--------|--|--|--------|--|--|--------|--|--|--------|--|--|--------|--|--|
| Min    |  |  | Max    |  |  | Min    |  |  | Max    |  |  | Max    |  |  | Max    |  |  | Max    |  |  |
| 0.1541 |  |  | 0.1512 |  |  | 0.1552 |  |  | 0.1542 |  |  | 0.1433 |  |  | 0.1442 |  |  | 0.1446 |  |  |

## Fuzzy RATMI

### The fuzzy weighted decision-making matrix

| Alternatives | Quality |        |        | Expenses |        |        | Delivery |        |        | Source |        |        | Flexibility |        |        | Communication |        |        | Reliability |        |        |
|--------------|---------|--------|--------|----------|--------|--------|----------|--------|--------|--------|--------|--------|-------------|--------|--------|---------------|--------|--------|-------------|--------|--------|
|              | Min     |        |        | Max      |        |        | Min      |        |        | Max    |        |        | Max         |        |        | Max           |        |        | Max         |        |        |
|              |         |        |        |          |        |        |          |        |        |        |        |        |             |        |        |               |        |        |             |        |        |
| Russia       | 0.0462  | 0.1028 | 0.2435 | 0.0324   | 0.0840 | 0.1907 | 0.0445   | 0.0981 | 0.2456 | 0.0355 | 0.0824 | 0.1735 | 0.0333      | 0.0830 | 0.1883 | 0.0287        | 0.0754 | 0.1724 | 0.0266      | 0.0709 | 0.1658 |
| Romania      | 0.0411  | 0.0841 | 0.1845 | 0.0536   | 0.1167 | 0.2413 | 0.0412   | 0.0867 | 0.1981 | 0.0329 | 0.0824 | 0.1807 | 0.0505      | 0.1127 | 0.2363 | 0.0413        | 0.0953 | 0.2035 | 0.0363      | 0.0854 | 0.1910 |
| Ukraine      | 0.0426  | 0.0949 | 0.2342 | 0.0381   | 0.0887 | 0.1868 | 0.0337   | 0.0690 | 0.1462 | 0.0592 | 0.1215 | 0.2457 | 0.0333      | 0.0808 | 0.1772 | 0.0355        | 0.0853 | 0.1862 | 0.0459      | 0.1042 | 0.2270 |
| Australia    | 0.0352  | 0.0741 | 0.1602 | 0.0536   | 0.1167 | 0.2413 | 0.0420   | 0.0909 | 0.2117 | 0.0290 | 0.0737 | 0.1662 | 0.0431      | 0.1021 | 0.2215 | 0.0527        | 0.1151 | 0.2380 | 0.0508      | 0.1125 | 0.2379 |
| Syria        | 0.0418  | 0.0926 | 0.2175 | 0.0479   | 0.1073 | 0.2257 | 0.0405   | 0.0847 | 0.1860 | 0.0461 | 0.1041 | 0.2168 | 0.0357      | 0.0872 | 0.1957 | 0.0344        | 0.0814 | 0.1828 | 0.0278      | 0.0729 | 0.1694 |

### The fuzzy magnitude of components' values

| Qk     |        |        | Qh     |        |        |
|--------|--------|--------|--------|--------|--------|
| 0.1195 | 0.2588 | 0.5363 | 0.0642 | 0.1421 | 0.3459 |

### Results of the Fuzzy MCRAT method

| Alternatives | Vik    |        |        | Vih    |        |        | Z11,j  |        |        | Z22,j  |        |        | tr(Zi)~ |        |        | tr(Zi) | Rank |
|--------------|--------|--------|--------|--------|--------|--------|--------|--------|--------|--------|--------|--------|---------|--------|--------|--------|------|
| Russia       | 0.0703 | 0.1773 | 0.3989 | 0.0642 | 0.1421 | 0.3459 | 0.0084 | 0.0459 | 0.2139 | 0.0041 | 0.0202 | 0.1196 | 0.0125  | 0.0661 | 0.3336 | 0.1017 | 5    |
| Romania      | 0.0976 | 0.2225 | 0.4739 | 0.0582 | 0.1208 | 0.2707 | 0.0117 | 0.0576 | 0.2542 | 0.0037 | 0.0172 | 0.0936 | 0.0154  | 0.0748 | 0.3478 | 0.1104 | 2    |
| Ukraine      | 0.0971 | 0.2175 | 0.4614 | 0.0544 | 0.1174 | 0.2761 | 0.0116 | 0.0563 | 0.2475 | 0.0035 | 0.0167 | 0.0955 | 0.0151  | 0.0730 | 0.3429 | 0.1083 | 3    |
| Australia    | 0.1045 | 0.2354 | 0.4981 | 0.0548 | 0.1173 | 0.2655 | 0.0125 | 0.0609 | 0.2671 | 0.0035 | 0.0167 | 0.0918 | 0.0160  | 0.0776 | 0.3590 | 0.1142 | 1    |
| Syria        | 0.0875 | 0.2047 | 0.4454 | 0.0582 | 0.1255 | 0.2862 | 0.0105 | 0.0530 | 0.2389 | 0.0037 | 0.0178 | 0.0990 | 0.0142  | 0.0708 | 0.3378 | 0.1059 | 4    |

### Results of the Fuzzy RAMS technique

| Alternatives | Max    |        |        | Min    |        |        | Median |        |        | Median Similarity |        |        | ms(MI) | Rank |
|--------------|--------|--------|--------|--------|--------|--------|--------|--------|--------|-------------------|--------|--------|--------|------|
|              | Qk~    |        |        | Qh~    |        |        | D~     |        |        | ms(MI~)           |        |        |        |      |
|              | 0.1195 | 0.2588 | 0.5363 | 0.0642 | 0.1421 | 0.3459 | 0.0678 | 0.1476 | 0.3191 |                   |        |        |        |      |
|              | Vik~   |        |        | Vih~   |        |        | DI~    |        |        |                   |        |        |        |      |
| Russia       | 0.0703 | 0.1773 | 0.3989 | 0.0642 | 0.1421 | 0.3459 | 0.0476 | 0.1136 | 0.2640 | 0.1492            | 0.7696 | 3.8920 | 1.1866 | 5    |
| Romania      | 0.0976 | 0.2225 | 0.4739 | 0.0582 | 0.1208 | 0.2707 | 0.0568 | 0.1266 | 0.2729 | 0.1780            | 0.8573 | 4.0232 | 1.2718 | 2    |
| Ukraine      | 0.0971 | 0.2175 | 0.4614 | 0.0544 | 0.1174 | 0.2761 | 0.0557 | 0.1236 | 0.2688 | 0.1744            | 0.8369 | 3.9638 | 1.2476 | 3    |
| Australia    | 0.1045 | 0.2354 | 0.4981 | 0.0548 | 0.1173 | 0.2655 | 0.0590 | 0.1315 | 0.2822 | 0.1849            | 0.8905 | 4.1611 | 1.3180 | 1    |
| Syria        | 0.0875 | 0.2047 | 0.4454 | 0.0582 | 0.1255 | 0.2862 | 0.0525 | 0.1201 | 0.2647 | 0.1646            | 0.8132 | 3.9025 | 1.2200 | 4    |

### Alternatives rankings according to the Fuzzy RATMI method

| Alternatives | Fuzzy MCRAT |        | Fuzzy RAMS |        | Majority Index |  | Rank |
|--------------|-------------|--------|------------|--------|----------------|--|------|
|              | tr*         | 0.1017 | ms*        | 1.1866 | Ei             |  |      |
|              | tr-         | 0.1142 | ms-        | 1.3180 |                |  |      |
|              | tr(Zi)      |        | ms(Mi)     |        |                |  |      |
|              |             |        |            |        |                |  |      |
| Russia       | 0.1017      |        | 1.1866     |        | 0.0000         |  | 5    |
| Romania      | 0.1104      |        | 1.2718     |        | 0.6695         |  | 2    |
| Ukraine      | 0.1083      |        | 1.2476     |        | 0.4959         |  | 3    |
| Australia    | 0.1142      |        | 1.3180     |        | 1.0000         |  | 1    |
| Syria        | 0.1059      |        | 1.2200     |        | 0.2929         |  | 4    |
